# Supplementary material for: Predicting Drug Concentration‐Time Profiles in Multiple CNS Compartments Using a Comprehensive Physiologically‐Based Pharmacokinetic Model
Source: PubMed Central journal article supplement — CPT Pharmacometrics Syst Pharmacol. 2017 Oct 13;6(11):765–77. doi: 10.1002/psp4.12250 (PMC5702903; doi:10.1002/psp4.12250), 2017-10-13
Supplement: PSP4-6-765-s014.pdf [file PSP4-6-765-s014.pdf]

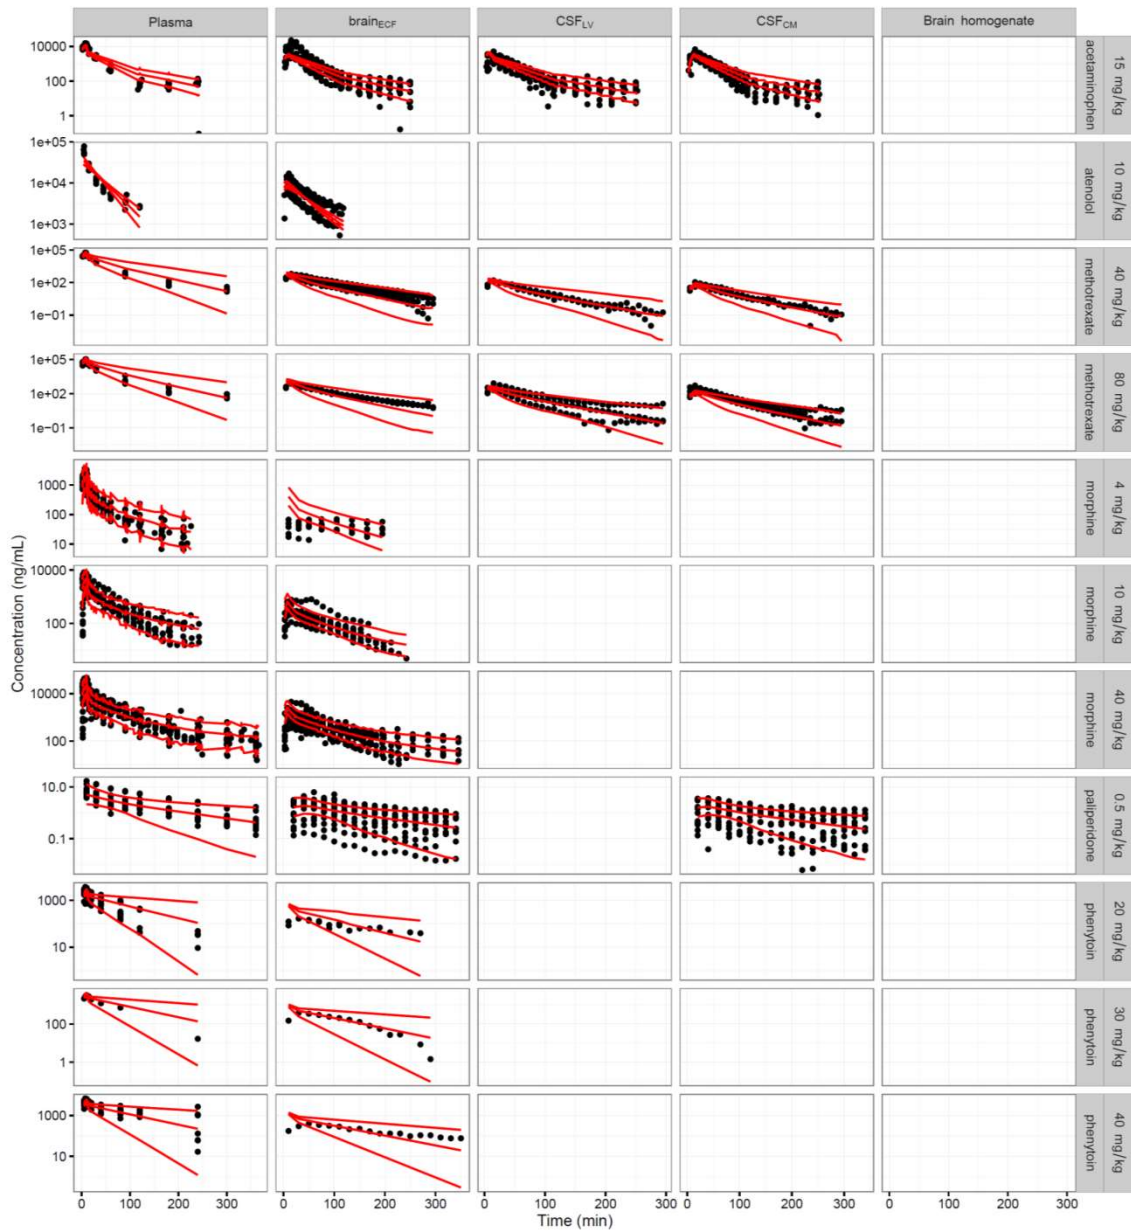

Figure S1\_1. Prediction of the PBPK model.

The plots were stratified by the CNS compartments (panels). Individual observed drug concentrations (dots) and 95 % prediction interval (red lines).

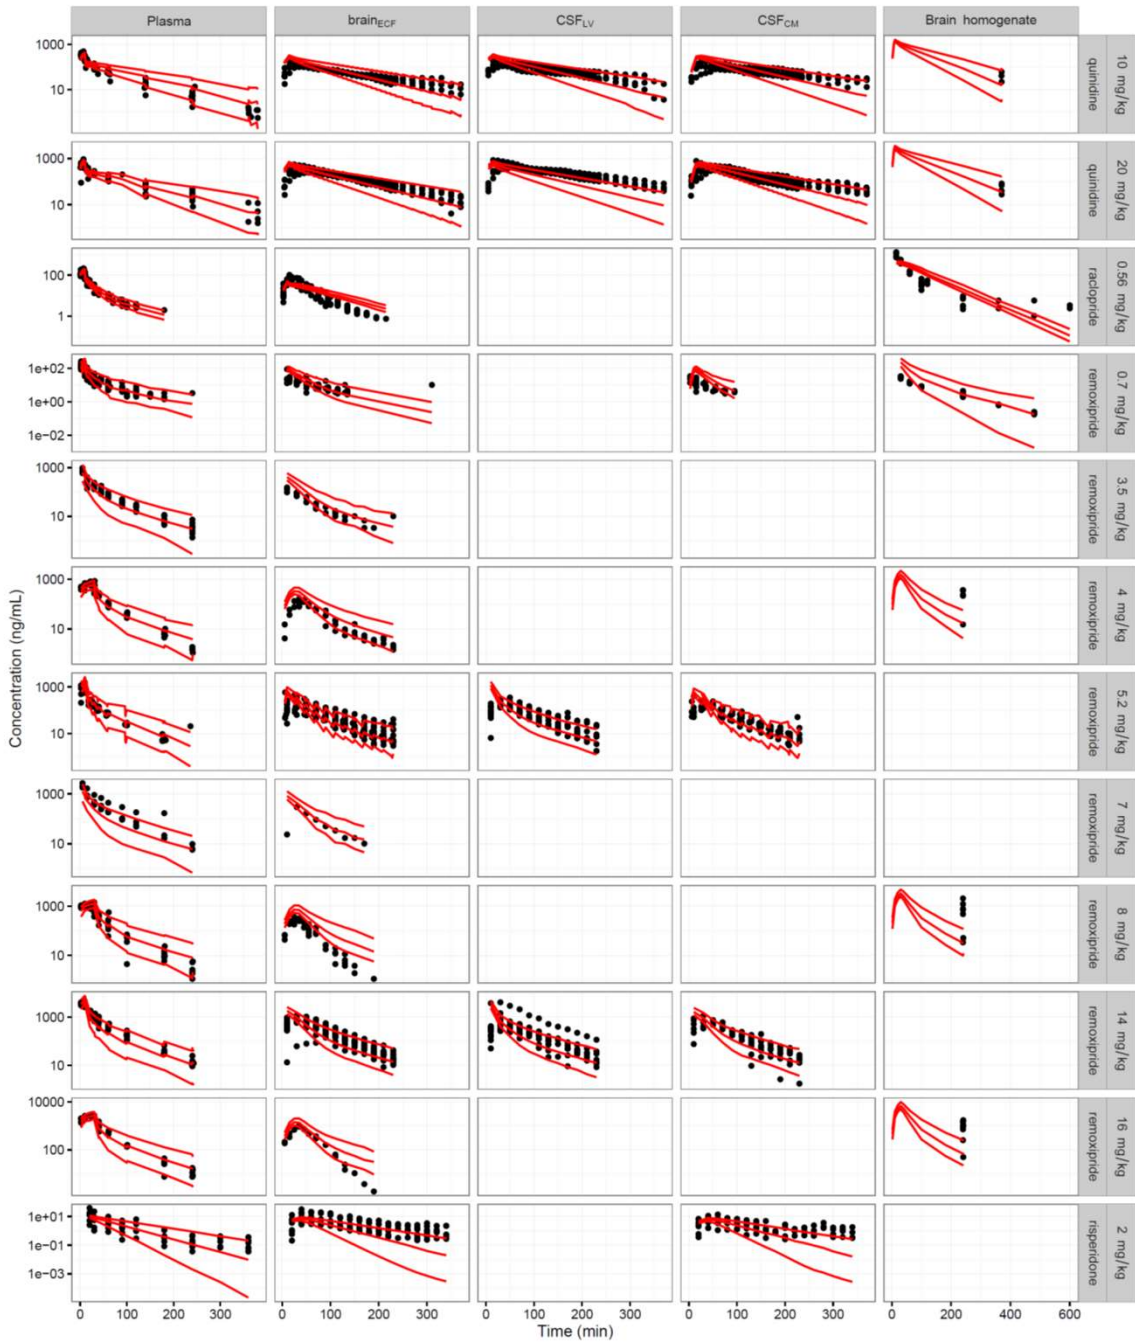

Figure S1\_2. Prediction of the PBPK model.

The plots were stratified by the CNS compartments (panels). Individual observed drug concentrations (dots) and 95 % prediction interval (red lines).
